# Supplementary material for: The influence of permafrost and other environmental factors on stream thermal sensitivity across Yukon, Canada
Source: Copernicus journal article supplement (doi:10.5194/hess-29-1083-2025), 2025-02-27
Supplement: Supplementary file 1 [file hess-29-1083-2025-supplement.pdf]

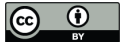

*Supplement of*

## **The influence of permafrost and other environmental factors on stream thermal sensitivity across Yukon, Canada**

**Andras J. Szeitz and Sean K. Carey**

*Correspondence to:* Andras J. Szeitz (szeitza@mcmaster.ca)

The copyright of individual parts of the supplement might differ from the article licence.

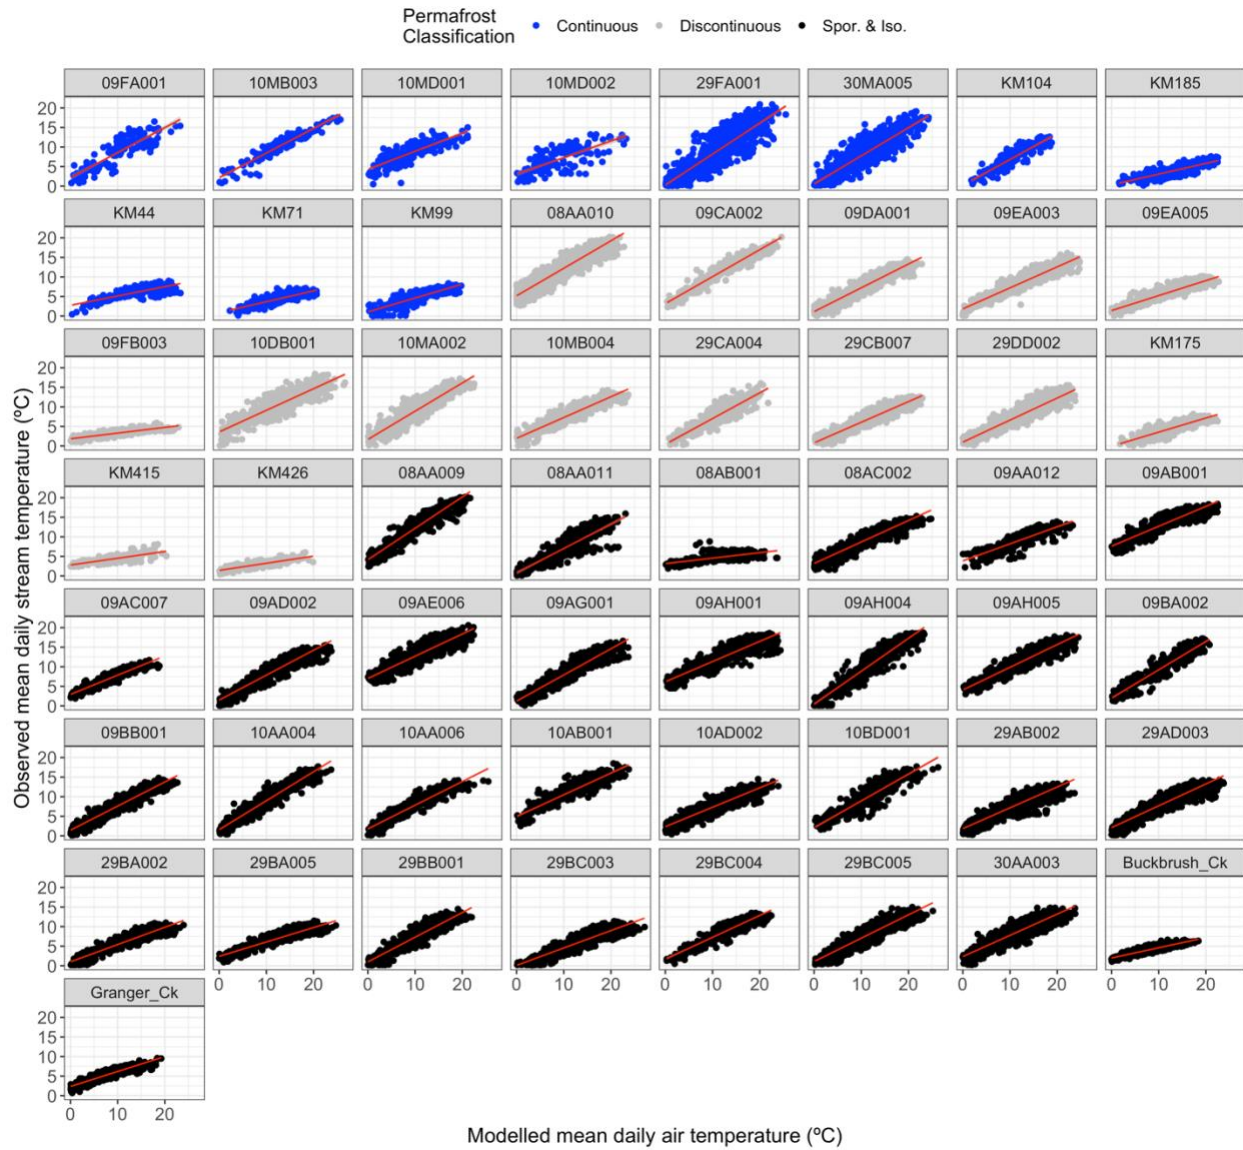

**Figure S1: Observed mean daily streamflow vs. modelled mean daily air temperature for the 57 study sites. The red lines are a linear regression, the slope of which is the ‘thermal sensitivity’ coefficient, and the intercept is the ‘baseline temperature’. The sites are grouped and coloured by permafrost classification.**
